# Supplementary material for: A Potential Association between Abdominal Obesity and the Efficacy of Humoral Immunity Induced by COVID-19 and by the AZD1222, Convidecia, BNT162b2, Sputnik V, and CoronaVac Vaccines
Source: MDPI journal article supplement (doi:10.3390/vaccines12010088), 2024-01-15
Supplement: s1 [file s1]

## Supplementary material

**Table S1.** Correlation of BMI with the level of anti-S1/S2 and anti-RBD IgG antibodies.

| Characteristic | Day | n   | BMI/anti-S1/S2 IgG antibodies |                 | BMI/anti-RBD neutralizing antibodies |                 |
|----------------|-----|-----|-------------------------------|-----------------|--------------------------------------|-----------------|
|                |     |     | Correlation coefficient       | <i>p</i> -value | Correlation coefficient              | <i>p</i> -value |
| Prior COVID-19 | 0   | 167 | 0.221                         | 0.004           | 0.234                                | 0.002           |
| All vaccine    | 21  | 338 | 0.237                         | <0.0001         | 0.210                                | <0.0001         |
|                | 90  | 369 | 0.133                         | 0.010           | 0.100                                | 0.055           |
|                | 180 | 354 | 0.057                         | 0.284           | 0.061                                | 0.251           |
|                | 270 | 320 | 0.170                         | 0.0022          | -0.056                               | 0.310           |
|                | 365 | 302 | 0.133                         | 0.0199          | -0.018                               | 0.745           |
| AZD1222        | 21  | 83  | 0.306                         | 0.005           | 0.220                                | 0.046           |
| Covidecia      | 21  | 74  | 0.244                         | 0.036           | 0.253                                | 0.030           |
| Sputnik V      | 21  | 72  | -                             | -               | 0.269                                | 0.022           |
|                | 90  | 76  | 0.272                         | 0.017           | 0.303                                | 0.008           |

The data is presented as a correlation coefficient. The *p*-value refers to a Spearman correlation analysis. The results were considered statistically significant when  $p < 0.05$ .

**Table S2.** Correlation of age with the level of anti-S1/S2 IgG antibodies and anti-RBD neutralization.

| Characteristic         | Day | n   | Age/anti-S1/S2 IgG antibodies |         | Age/anti-RBD antibodies |         |
|------------------------|-----|-----|-------------------------------|---------|-------------------------|---------|
|                        |     |     | Correlation coefficient       | p-value | Correlation coefficient | p-value |
| Prior COVID-19         | 0   | 167 | 0.252                         | 0.001   | 0.235                   | 0.002   |
| All                    | 21  | 338 | 0.064                         | 0.244   | 0.136                   | 0.012   |
|                        | 90  | 369 | 0.208                         | <0.0001 | 0.162                   | 0.002   |
|                        | 180 | 354 | 0.084                         | 0.113   | -0.064                  | 0.270   |
|                        | 270 | 320 | 0.054                         | 0.335   | -0.200                  | 0.0003  |
|                        | 365 | 302 | -0.098                        | 0.088   | -0.324                  | <0.0001 |
| Prior COVID-19 AO−     | 0   | 54  | 0.344                         | 0.011   | 0.309                   | 0.023   |
| Participants AO−       | 21  | 148 | 0.052                         | 0.528   | 0.166                   | 0.043   |
|                        | 90  | 159 | 0.189                         | 0.017   | 0.161                   | 0.042   |
|                        | 180 | 151 | 0.052                         | 0.529   | -0.138                  | 0.092   |
|                        | 270 | 137 | 0.028                         | 0.742   | -0.258                  | 0.0023  |
|                        | 365 | 116 | -0.154                        | 0.098   | -0.379                  | <0.0001 |
| Prior COVID-19 AO+     | 0   | 111 | 0.183                         | 0.055   | 0.111                   | 0.152   |
| Participants AO+       | 21  | 190 | -0.140                        | 0.851   | 0.011                   | 0.880   |
|                        | 90  | 210 | 0.155                         | 0.024   | 0.096                   | 0.164   |
|                        | 180 | 203 | 0.069                         | 0.331   | -0.017                  | 0.813   |
|                        | 270 | 183 | 0.026                         | 0.720   | -0.144                  | 0.051   |
|                        | 365 | 186 | -0.086                        | 0.239   | -0.275                  | 0.0001  |
| Without prior COVID-19 | 0   | 220 | 0.030                         | 0.658   | 0.039                   | 0.566   |
|                        | 21  | 189 | 0.031                         | 0.675   | 0.161                   | 0.026   |
|                        | 90  | 211 | 0.222                         | 0.001   | 0.208                   | 0.002   |
|                        | 180 | 203 | 0.004                         | 0.959   | -0.11                   | 0.119   |
|                        | 270 | 186 | 0.038                         | 0.605   | -0.180                  | 0.013   |
|                        | 365 | 165 | -0.183                        | 0.018   | -0.360                  | <0.0001 |
| With prior COVID-19    | 0   | 167 | 0.252                         | 0.001   | 0.235                   | 0.002   |
|                        | 21  | 149 | 0.289                         | <0.0001 | 0.254                   | 0.001   |
|                        | 90  | 158 | 0.370                         | <0.0001 | 0.178                   | 0.026   |
|                        | 180 | 151 | 0.404                         | <0.0001 | 0.102                   | 0.215   |
|                        | 270 | 134 | 0.070                         | 0.416   | -0.229                  | 0.0076  |
|                        | 365 | 137 | 0.020                         | 0.812   | -0.266                  | 0.0016  |

The data is presented as a correlation coefficient. The results were considered statistically significant when  $p < 0.05$ . Abbreviations: AO−, Without Abdominal Obesity; AO+, With Abdominal Obesity.
